# Supplementary material for: How HIV-1 Integrase Associates with Human Mitochondrial Lysyl-tRNA Synthetase
Source: PubMed Central journal article supplement (PMC7589778; doi:10.3390/v12101202), 2020-10-21
Supplement: viruses-12-01202-s001.pdf [file viruses-12-01202-s001.pdf]

## **Supplementary Materials**

**How HIV-1 integrase associates with human mitochondrial lysyl-tRNA synthetase ?**

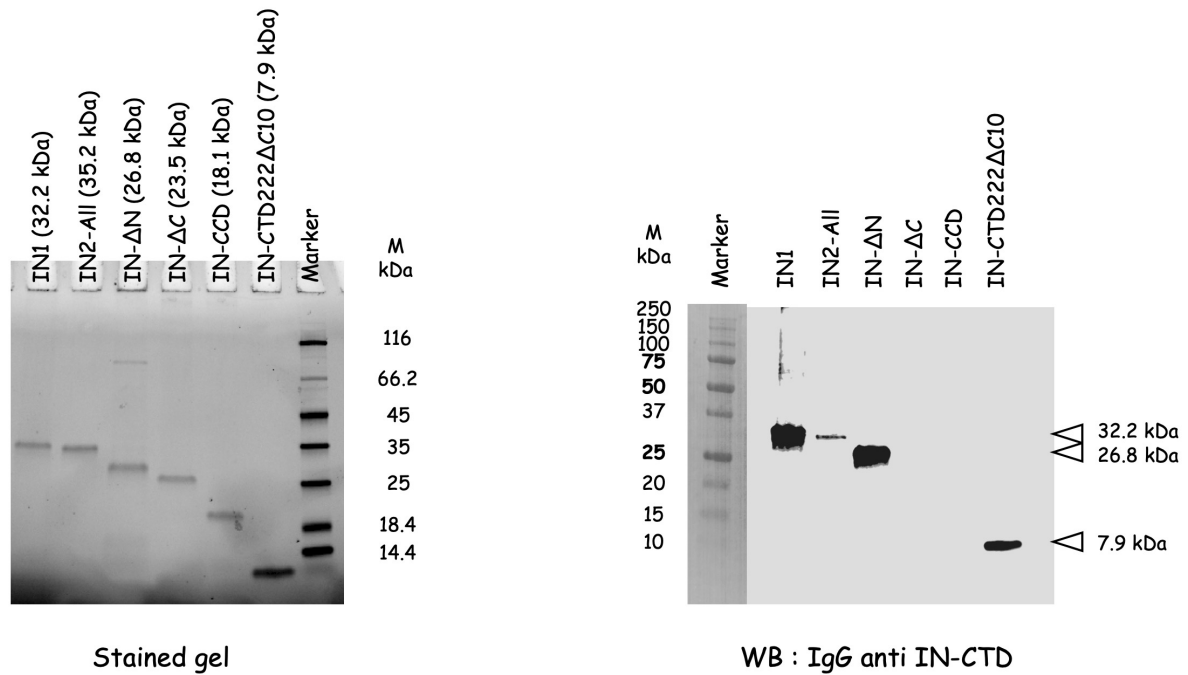

**Figure S1: Characterization of polyclonal anti-IN-CTD antibodies.** Different constructs of integrase (100 ng of protein) were separated by SDS-PAGE on a stain-free gel (Biorad) (left) and subjected to Western blotting using a polyclonal antibody (GeneCust) raised against the CTD of IN from HIV-1 (right). The different IN species are : IN-HIV-1 (IN1), IN-HIV-2\_ALL (IN2-All), IN-HIV-1 with a deletion of the NTD (IN-ΔN), IN-HIV-1 with a deletion of the CTD (IN-ΔC), the CCD of IN-HIV-1 (IN-CCD), the CTD222ΔC10 domain of IN-HIV-1 (IN-CTD222ΔC10).

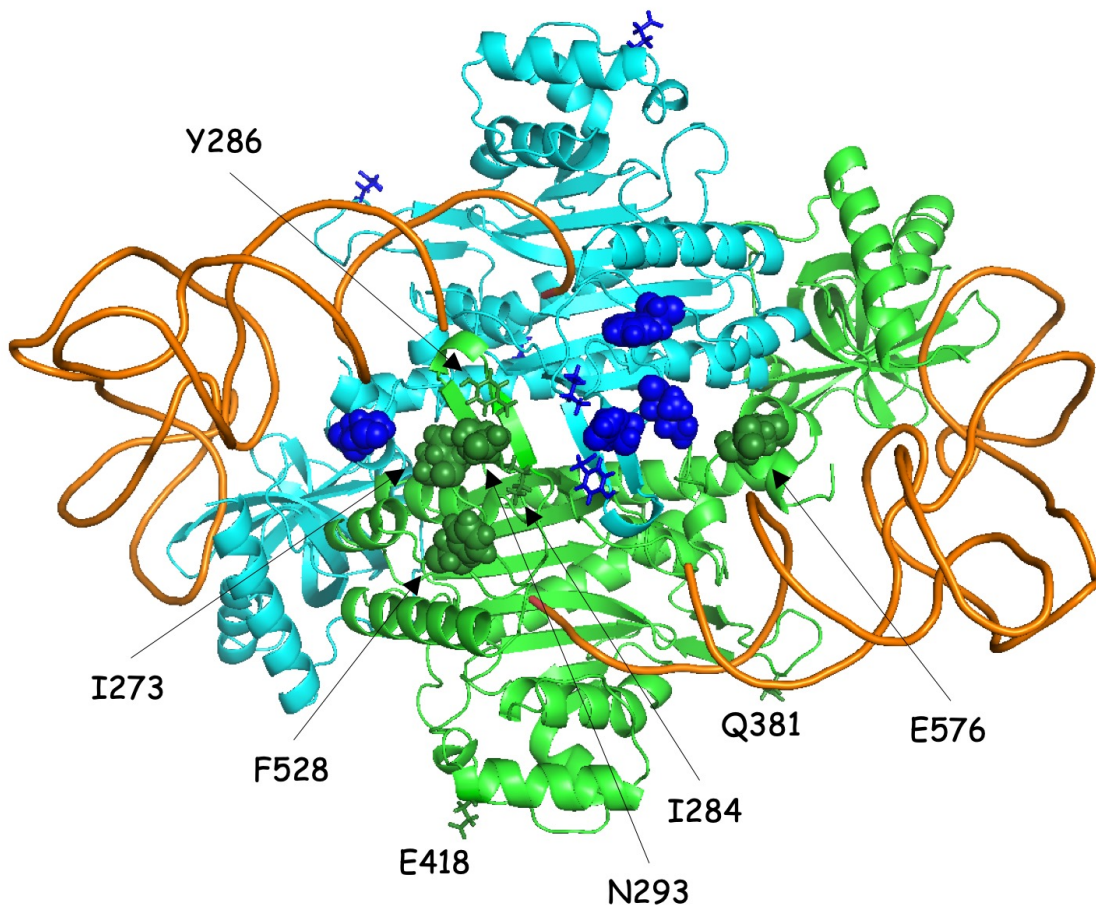

Figure S2: Localization of  $\rho$ Bpa-cross-linked residues on the 3D-structure of LysRS. The two monomers are in green and cyan, the two tRNA molecules are in orange. Side-chains of residues I273, N293, F528 and E576 are indicated by spheres, and of residues I284, Y286, H364, Q381 and E418 are indicated by sticks.

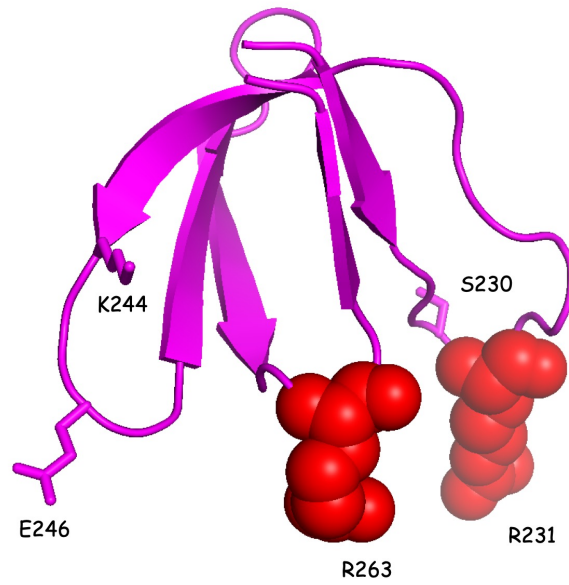

**Figure S3: Localization of pBpa-cross-linked residues on the 3D-structure of IN-CTD.** Side-chains of residues R231 and R263 are indicated by spheres in red, and of residues S230, K244 and E246 are indicated by spheres in magenta.

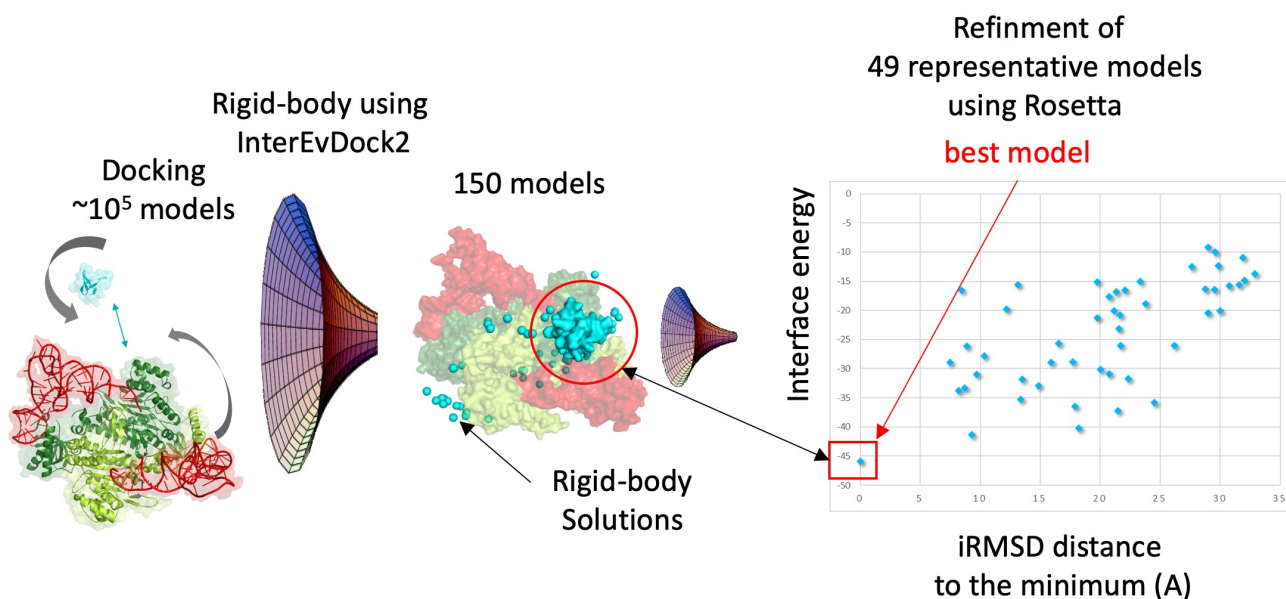

Figure S4: Pipeline used for the generation of the structural model of mLysRS:IN-CTD complex.

InterEvDock2 server including the frodock rigid-body algorithm was used to generate  $10^5$  decoys, rescore the best  $10^4$  decoys by a consensus score and extract the best 150 decoys fulfilling InterEvDock2 consensus. After clustering, a subset of 49 representative models were further refined using Rosetta. The centroids of the 150 IN-CTD domains are represented as cyan dots docked against the green surface representation of mLysRS dimer with tRNA shown in red. The model of IN-CTD domain having the best interface energy after refinement is shown in cyan surface. The interface energy of the best model is plotted on the right panel versus the interface RMSD between that model and the 48 alternative refined models. The model with best interface energy is highly consistent with most of the experimental constraints generated in the study and its coordinates can be accessed at <https://modelarchive.org/doi/10.5452/ma-bxirn>.

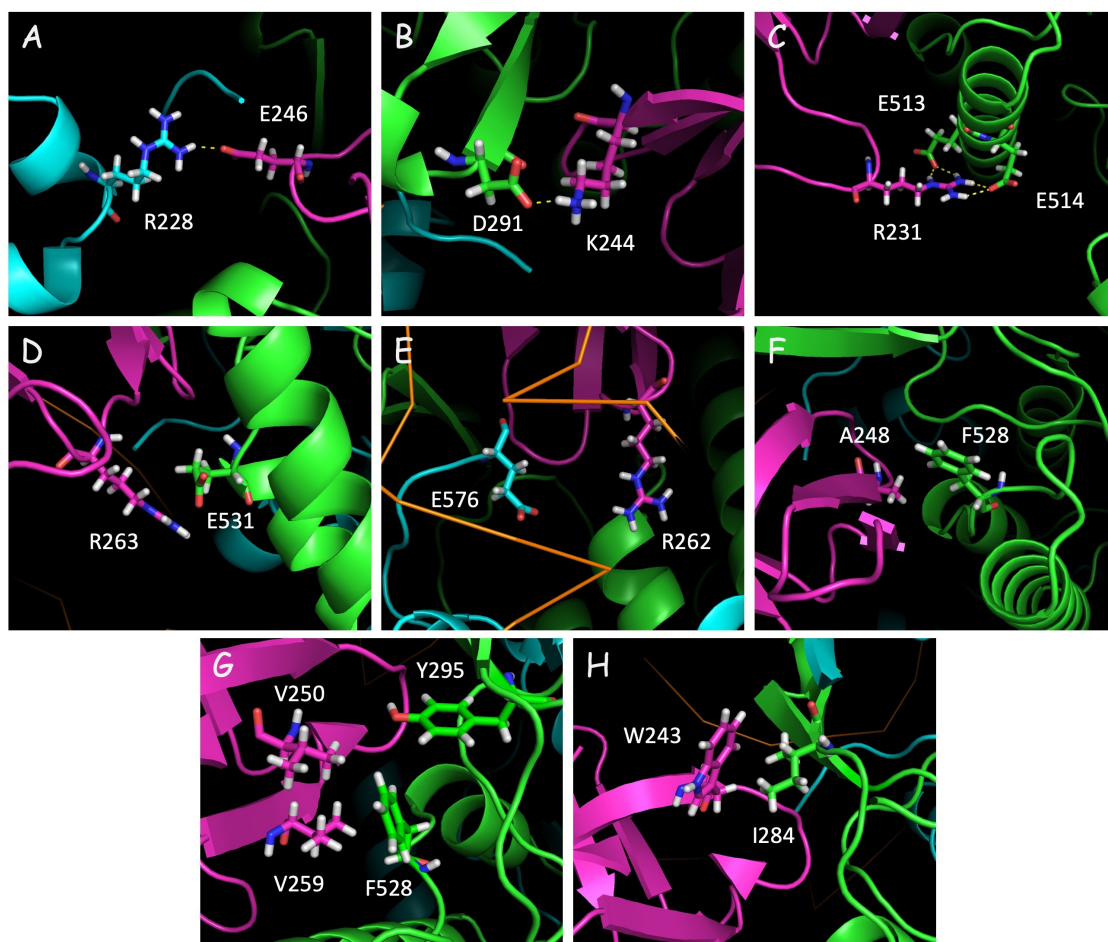

Figure S5: Interaction of suggested key residues at the interface of mLysRS with the CTD of HIV-1 integrase. The two monomers of mLysRS are shown in cyan and green, IN-CTD is shown in magenta. The residues suggested to play an important role in the interaction are depicted as sticks. The backbone of the tRNA molecule is shown in orange. The possible salt bridges are depicted as yellow dashed lines. (A) IN\_E246 and LysRS\_R228; (B) IN\_K244 and LysRS\_D291; (C) IN\_R231 and LysRS\_E513/514; (D) IN\_R263 and LysRS\_E531; (E) IN\_R262 and LysRS\_E576; (F) IN\_A248 and LysRS\_F528; (G) IN\_V250, IN\_V259 and LysRS\_Y295, LysRS\_F528; (H) IN\_W243 and LysRS\_I284.

**Table S1: Sequence identities between IN species**

| Domain | Species 1 / Species 2 |           | Identities (%) |
|--------|-----------------------|-----------|----------------|
| IN     | HIV-1                 | HIV-2_TRA | 60.1           |
|        | HIV-1                 | HIV-2_ALL | 59.7           |
|        | HIV-2_TRA             | HIV-2_ALL | 96.5           |
| IN-NTD | HIV-1                 | HIV-2_TRA | 53.8           |
|        | HIV-1                 | HIV-2_ALL | 53.8           |
|        | HIV-2_TRA             | HIV-2_ALL | 97.4           |
| IN-CCD | HIV-1                 | HIV-2_TRA | 64.1           |
|        | HIV-1                 | HIV-2_ALL | 64.1           |
|        | HIV-2_TRA             | HIV-2_ALL | 96.6           |
| IN-CTD | HIV-1                 | HIV-2_TRA | 71.1           |
|        | HIV-1                 | HIV-2_ALL | 68.9           |
|        | HIV-2_TRA             | HIV-2_ALL | 97.8           |

**Table S2:** Position of *p*Bpa insertion into mLysRS

| Residue | Position in LysRS <sup>+</sup> | Position in pmLysRS* |
|---------|--------------------------------|----------------------|
| Asp     | 222                            | 250                  |
| Phe     | 239                            | 267                  |
| Glu     | 260                            | 288                  |
| Glu     | 267                            | 295                  |
| Ile     | 273                            | 301                  |
| Ile     | 284                            | 312                  |
| Tyr     | 286                            | 314                  |
| Asn     | 288                            | 316                  |
| Asp     | 291                            | 319                  |
| Asn     | 293                            | 321                  |
| Tyr     | 295                            | 323                  |
| Lys     | 356                            | 384                  |
| His     | 364                            | 392                  |
| Lys     | 370                            | 398                  |
| Glu     | 379                            | 407                  |
| Gln     | 381                            | 409                  |
| Asp     | 384                            | 412                  |
| Arg     | 392                            | 420                  |
| Glu     | 398                            | 426                  |
| Lys     | 402                            | 430                  |
| Met     | 406                            | 434                  |
| Glu     | 410                            | 438                  |
| Glu     | 418                            | 446                  |
| Lys     | 421                            | 449                  |
| Val     | 428                            | 456                  |
| Pro     | 436                            | 464                  |
| Arg     | 477                            | 505                  |
| Gln     | 510                            | 538                  |
| Lys     | 517                            | 545                  |
| Ala     | 520                            | 548                  |
| Asp     | 524                            | 552                  |
| Phe     | 528                            | 556                  |
| Glu     | 531                            | 559                  |
| Phe     | 570                            | 598                  |
| Glu     | 576                            | 604                  |

<sup>+</sup> numbering is according to PDB file 3BJU for cytoplasmic LysRS

\* numbering is according to the sequence of premitochondrial LysRS encoded in AF285758.



**Table S3:** Position of *p*Bpa insertion into IN-CTD222ΔC10

| <u>Residue</u> | <u>Position in IN-CTD<sup>+</sup></u> |
|----------------|---------------------------------------|
| Arg            | 224                                   |
| Ser            | 230                                   |
| Arg            | 231                                   |
| Trp            | 235                                   |
| Lys            | 240                                   |
| Trp            | 243                                   |
| Lys            | 244                                   |
| Glu            | 246                                   |
| Asn            | 254                                   |
| Val            | 259                                   |
| Arg            | 263                                   |
| Arg            | 269                                   |

<sup>+</sup> numbering is according to PDB file 5U1C

---

**Table S4: Mutations supposed to alter association of mLysRS with IN-CTD \*\***

---

| Mutations in mLysRS                                  | Mutations in IN-CTD |
|------------------------------------------------------|---------------------|
| Mutations supposed to create electrostatic repulsion |                     |
| LysRS_R228E                                          | IN_E246R            |
| LysRS_D291K                                          | IN_K244D            |
| LysRS_E513/514R *                                    | IN_R231E            |
| LysRS_E531R                                          | IN_R263E            |
| LysRS_E576R                                          | IN_R262E            |
| Mutations supposed to alter hydrophobic interactions |                     |
| LysRS_Y295E                                          | -                   |
| LysRS_F528A                                          | IN_A248M            |
| LysRS_F528E                                          | -                   |
| -                                                    | IN_W243A            |
| -                                                    | IN_A248E            |
| -                                                    | IN_V250E            |
| -                                                    | IN_V259E            |

---

\*double mutant E513R and E514R

\*\*mutations in mLysRS that are supposed to be compensated by a mutation in IN-CTD are listed side by side
